# Supplementary material for: Investigating the incidence and magnitude of heterotopic ossification with and without joints involvement in patients with a limb fracture and mild traumatic brain injury
Source: PubMed Central journal article supplement — Bone Rep. 2019 Aug 13;11:100222. doi: 10.1016/j.bonr.2019.100222 (PMC6706636; doi:10.1016/j.bonr.2019.100222), 2019-08-13
Supplement: mmc1.pdf [file mmc1.pdf]

## **Multiple files are bound together in this PDF Package.**

Adobe recommends using Adobe Reader or Adobe Acrobat version 8 or later to work with documents contained within a PDF Package. By updating to the latest version, you'll enjoy the following benefits:

- Efficient, integrated PDF viewing
- Easy printing
- Quick searches

**Don't have the latest version of Adobe Reader?**

**[Click here to download the latest version of Adobe Reader](#)**

**If you already have Adobe Reader 8,  
click a file in this PDF Package to view it.**
